# Supplementary material
Source: PubMed Central journal article supplement (PMC3426505)

Supplemental Figure 1

**A**

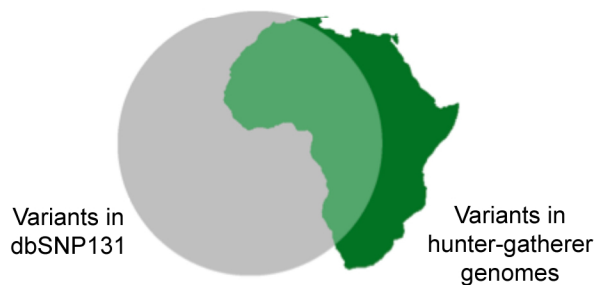

**B**

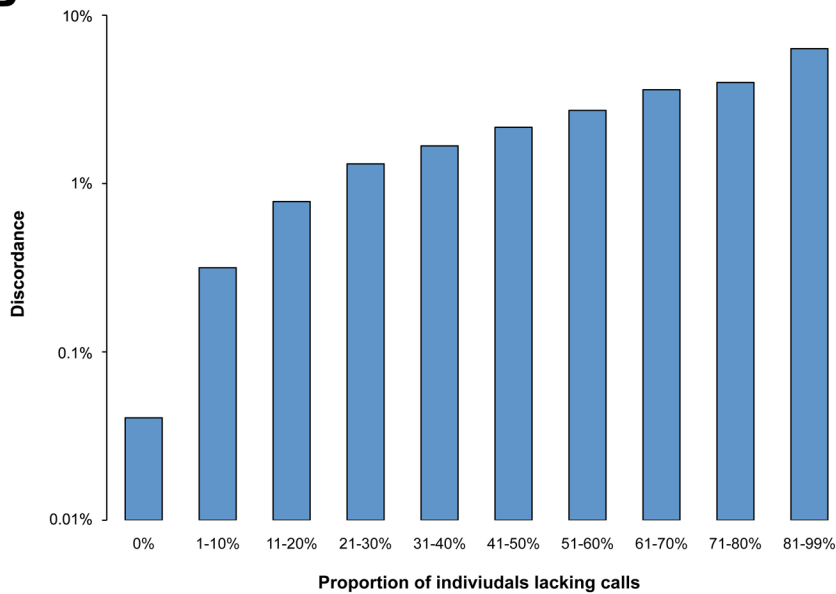

**C**

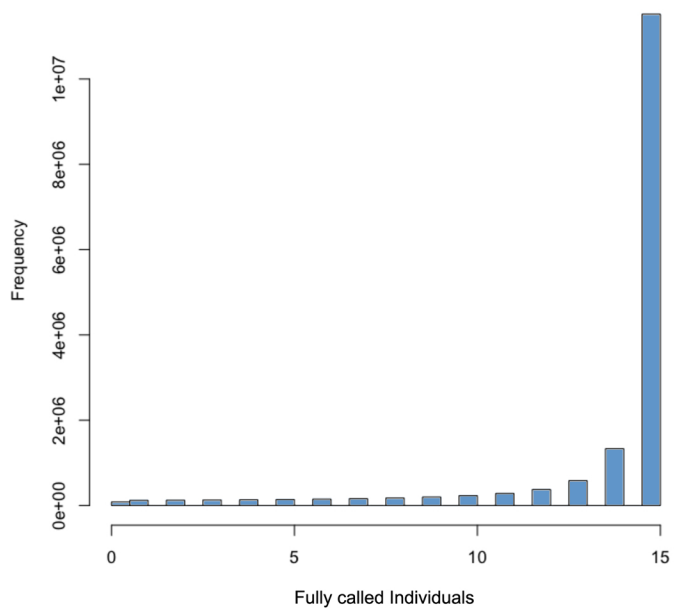

**D**

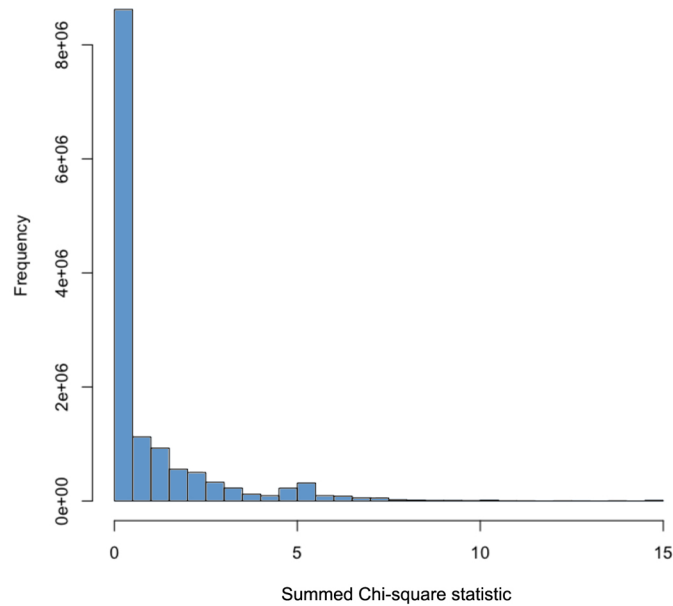

# Supplemental Figure 2

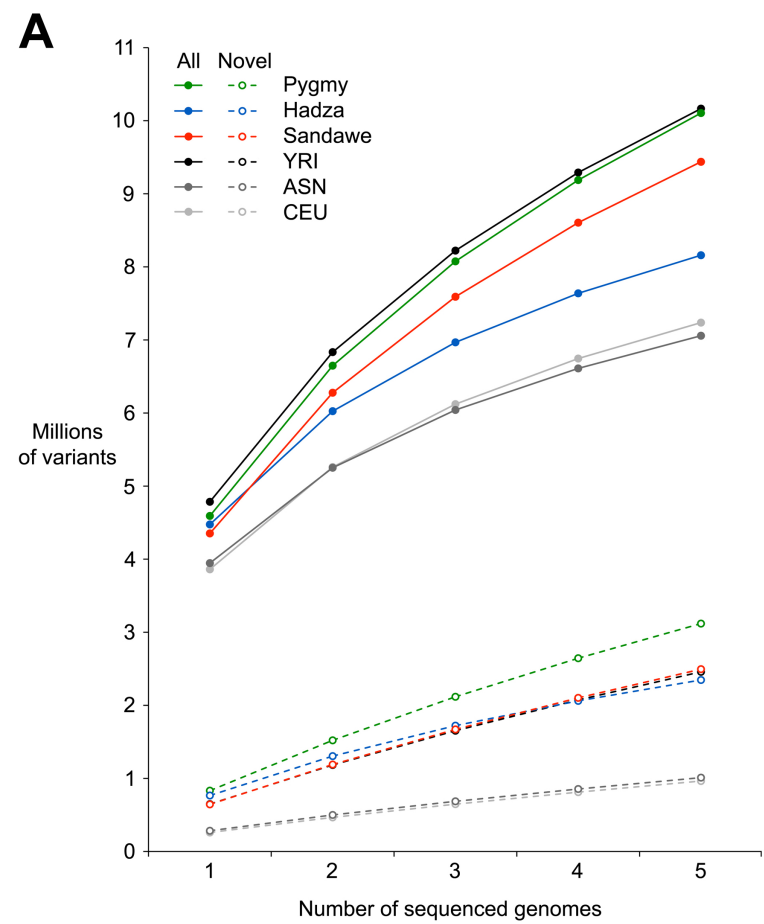

**B**

| Population     | Type of variant | $\alpha$            | $\beta$ | Diploid genomes needed to reach 25 million variants |
|----------------|-----------------|---------------------|---------|-----------------------------------------------------|
| Pygmy          | All             | $4.652 \times 10^6$ | 0.4912  | 30.67                                               |
|                | Novel           | $8.449 \times 10^6$ | 0.8227  | 61.40                                               |
| Hadza          | All             | $4.551 \times 10^6$ | 0.3742  | 94.87                                               |
|                | Novel           | $7.830 \times 10^6$ | 0.6982  | 142.68                                              |
| Sandawe        | All             | $4.415 \times 10^6$ | 0.4819  | 36.52                                               |
|                | Novel           | $6.524 \times 10^6$ | 0.8426  | 75.72                                               |
| Yoruba (YRI)   | All             | $4.852 \times 10^6$ | 0.4691  | 32.95                                               |
|                | Novel           | $6.565 \times 10^6$ | 0.8296  | 80.42                                               |
| European (CEU) | All             | $3.926 \times 10^6$ | 0.3913  | 113.41                                              |
|                | Novel           | $2.862 \times 10^6$ | 0.7898  | 287.03                                              |
| Asian (ASN)    | All             | $4.007 \times 10^6$ | 0.3620  | 157.21                                              |
|                | Novel           | $2.623 \times 10^6$ | 0.8153  | 267.61                                              |

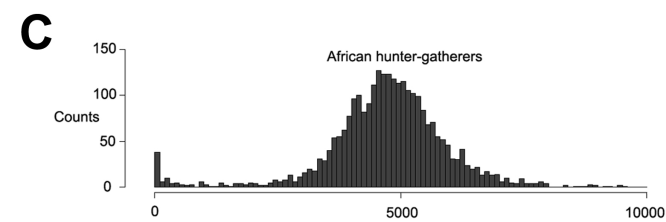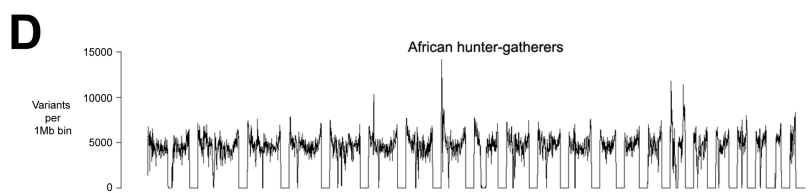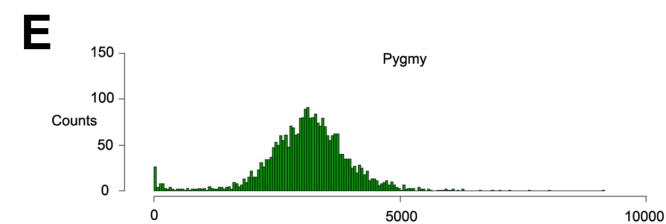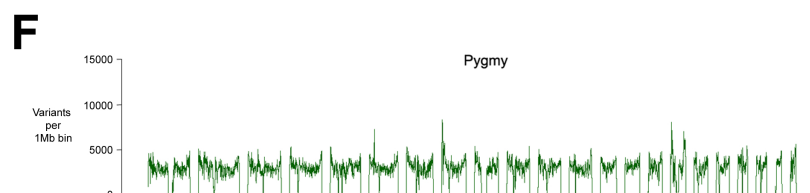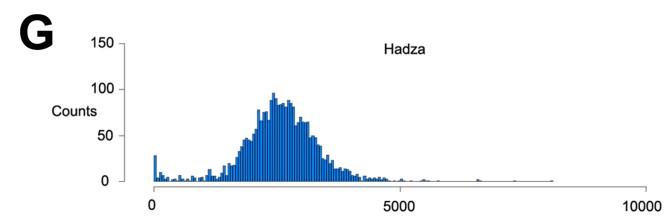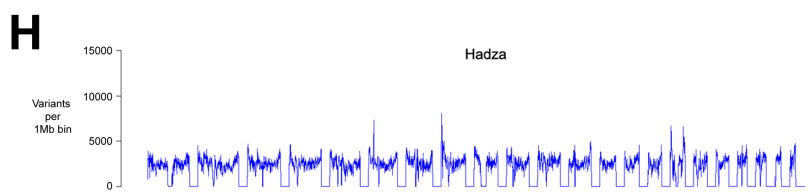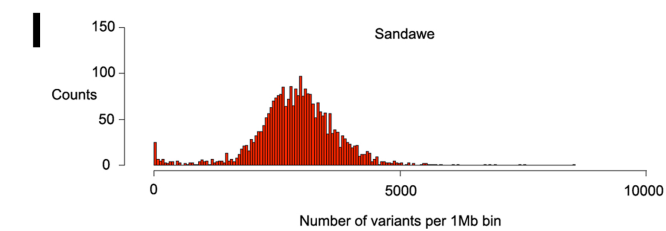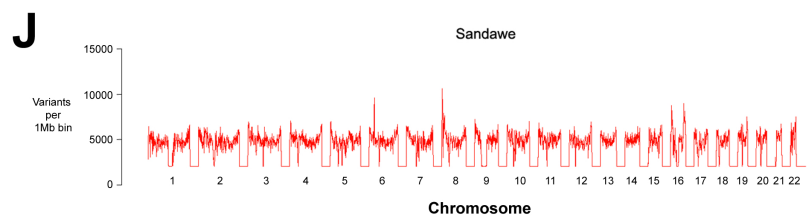

# Supplemental Figure 3

**A**
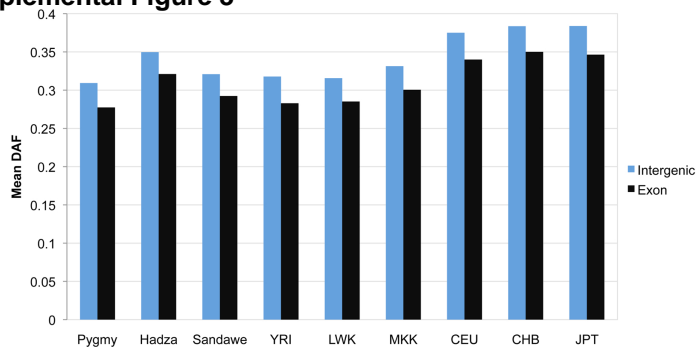
**B**
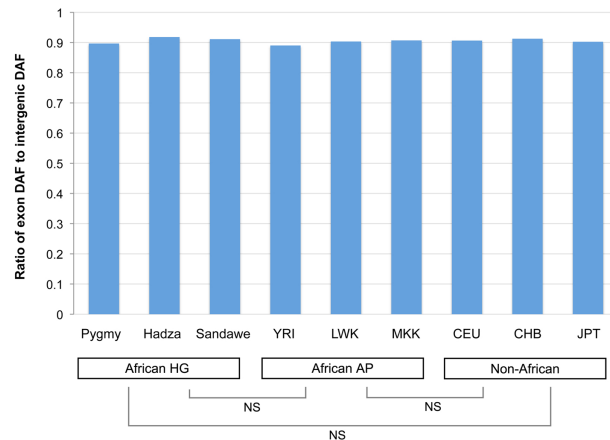
**C**
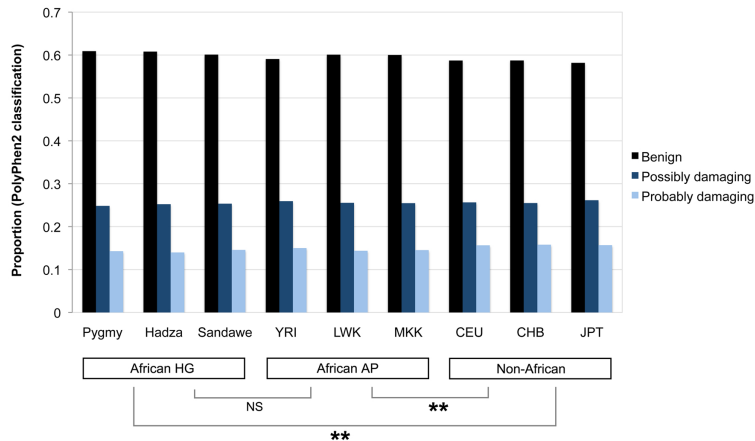
**D**
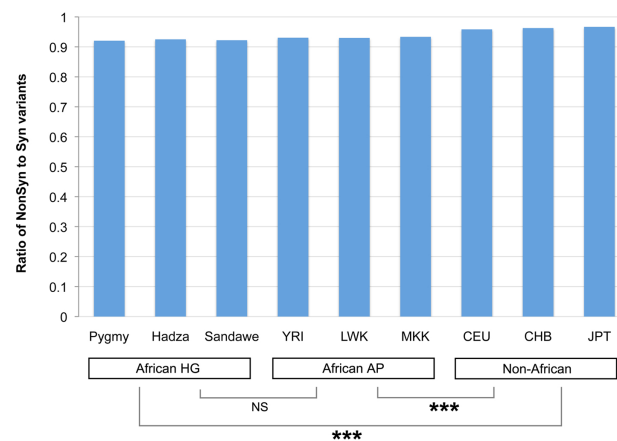
**E**

| Comparison                          | Selective signature                       | Test                                | p-value                   |
|-------------------------------------|-------------------------------------------|-------------------------------------|---------------------------|
| Means differ among all three groups | DAF ratio (intergenic/exon)               | One-way ANOVA ( $F_{(2,6)}=0.842$ ) | $4.76 \times 10^{-1}$     |
|                                     | PolyPhen-2 "probably damaging" proportion | One-way ANOVA ( $F_{(2,6)}=25.0$ )  | $1.22 \times 10^{-3}$ **  |
|                                     | Nonsynonymous/synonymous ratio            | One-way ANOVA ( $F_{(2,6)}=107$ )   | $2.03 \times 10^{-5}$ *** |
| African HG vs. African AP           | DAF ratio (intergenic/exon)               | Tukey HSD                           | $4.88 \times 10^{-1}$     |
|                                     | PolyPhen-2 "probably damaging" proportion | Tukey HSD                           | $2.70 \times 10^{-1}$     |
|                                     | Nonsynonymous/synonymous ratio            | Tukey HSD                           | $6.35 \times 10^{-2}$     |
| African HG vs. Non-African          | DAF ratio (intergenic/exon)               | Tukey HSD                           | $6.01 \times 10^{-1}$     |
|                                     | PolyPhen-2 "probably damaging" proportion | Tukey HSD                           | $5.45 \times 10^{-3}$ **  |
|                                     | Nonsynonymous/synonymous ratio            | Tukey HSD                           | $8.34 \times 10^{-5}$ *** |
| African AP vs. Non-African          | DAF ratio (intergenic/exon)               | Tukey HSD                           | $9.76 \times 10^{-1}$     |
|                                     | PolyPhen-2 "probably damaging" proportion | Tukey HSD                           | $1.20 \times 10^{-3}$ **  |
|                                     | Nonsynonymous/synonymous ratio            | Tukey HSD                           | $2.14 \times 10^{-5}$ *** |

# Supplemental Figure 4

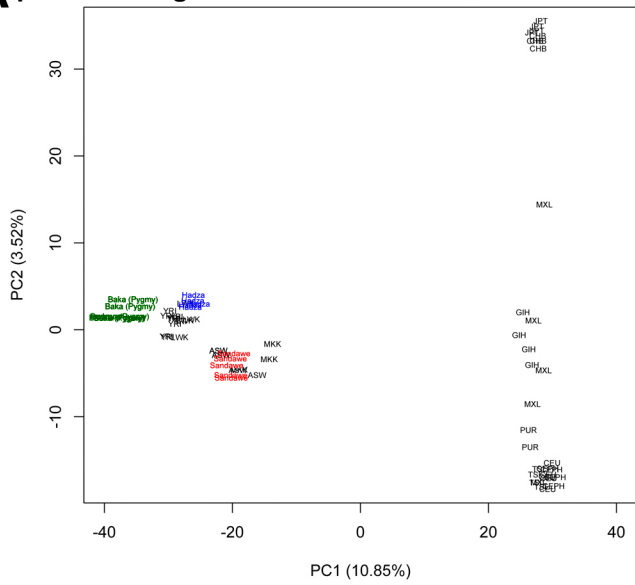

# B

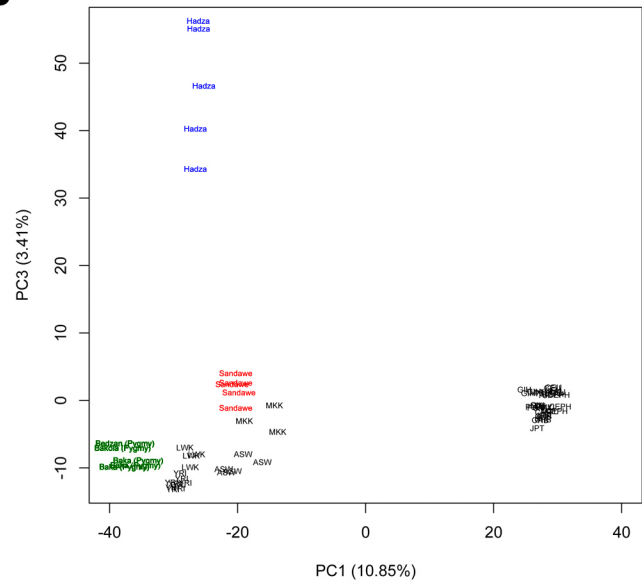

# C

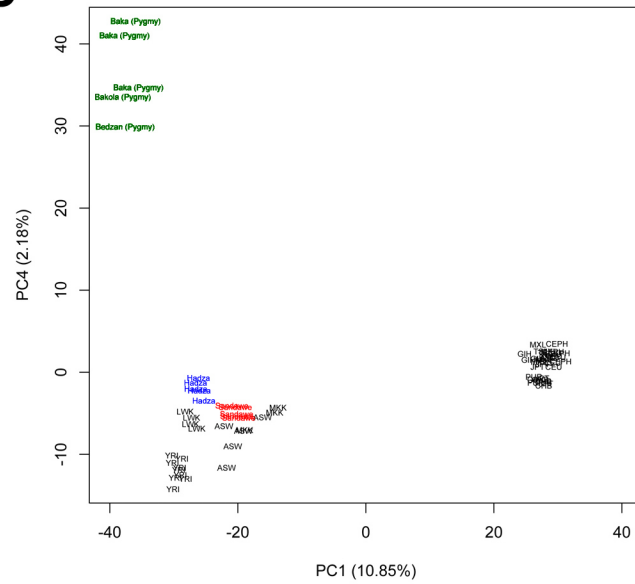

# D

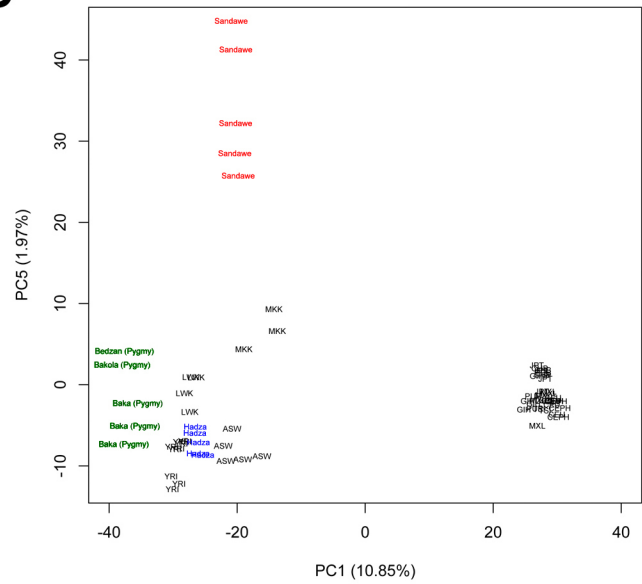

# E

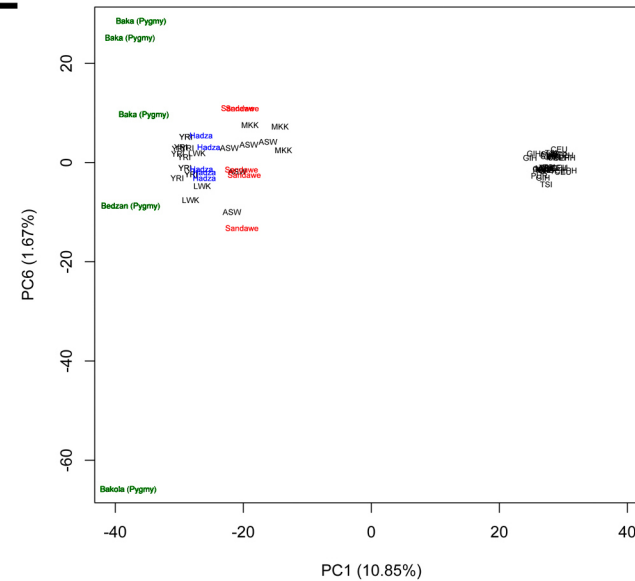

# F

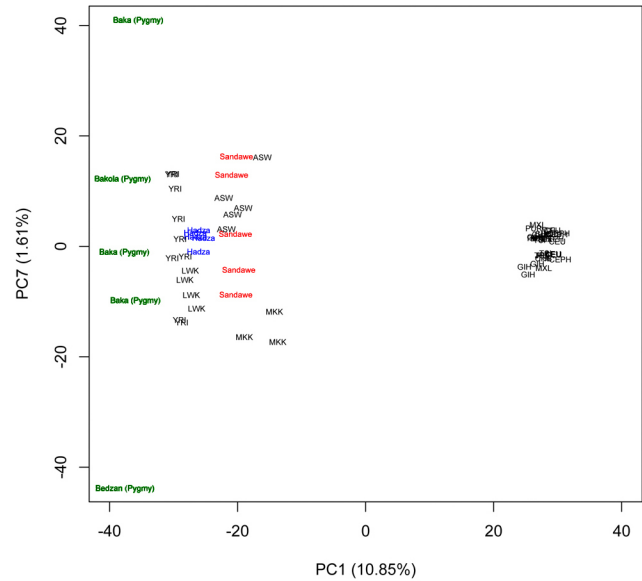



**ROH > 100kb**

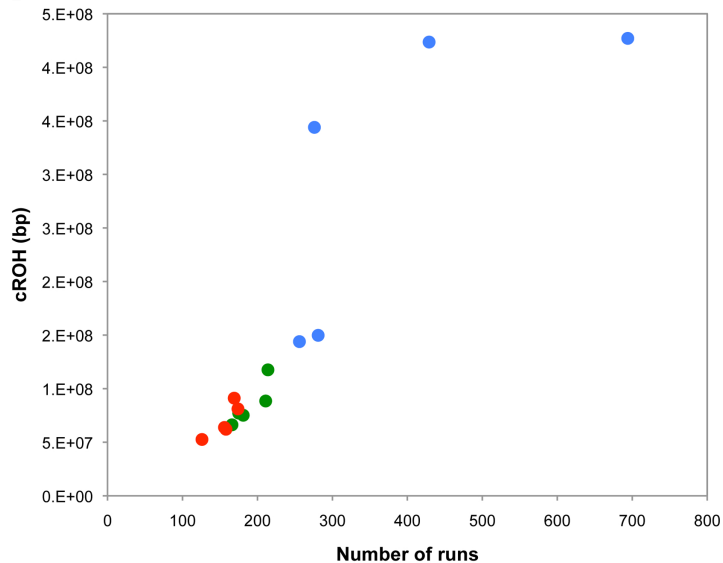

**B**

**ROH > 1Mb**

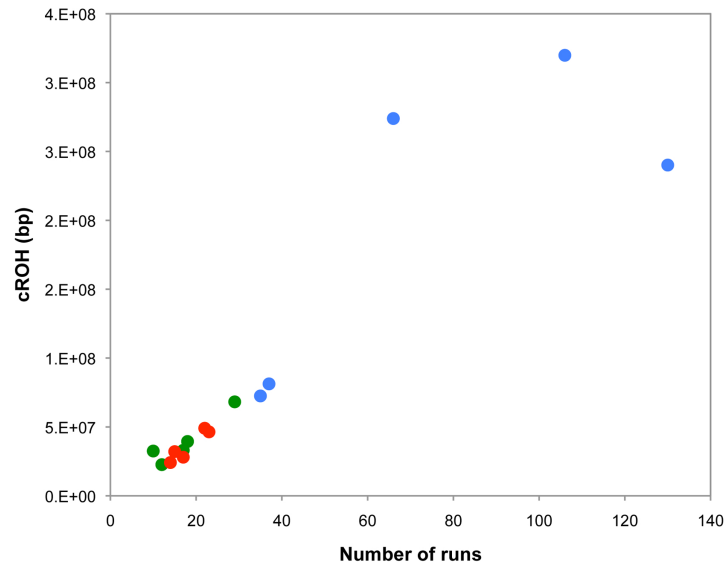

**C**

| Statistics           | Pygmy          | Hadza            | Sandawe        |
|----------------------|----------------|------------------|----------------|
| <b>ROH &gt;100kb</b> |                |                  |                |
| Number of ROH        | 189 ± 22       | 387 ± 285        | 157 ± 19       |
| cROH                 | 84.9 ± 19.9 Mb | 297.6 ± 141.6 Mb | 70.1 ± 15.6 Mb |
| CV (of cROH)         | 0.234          | 0.476            | 0.222          |
| <b>ROH &gt;1Mb</b>   |                |                  |                |
| Number of ROH        | 17.2 ± 7.4     | 74.8 ± 42.2      | 18.2 ± 4.1     |
| cROH                 | 39.2 ± 17.3 Mb | 197.5 ± 113.7Mb  | 35.9 ± 11.2 Mb |
| CV (of cROH)         | 0.442          | 0.576            | 0.311          |

Supplemental Figure 6

**A**

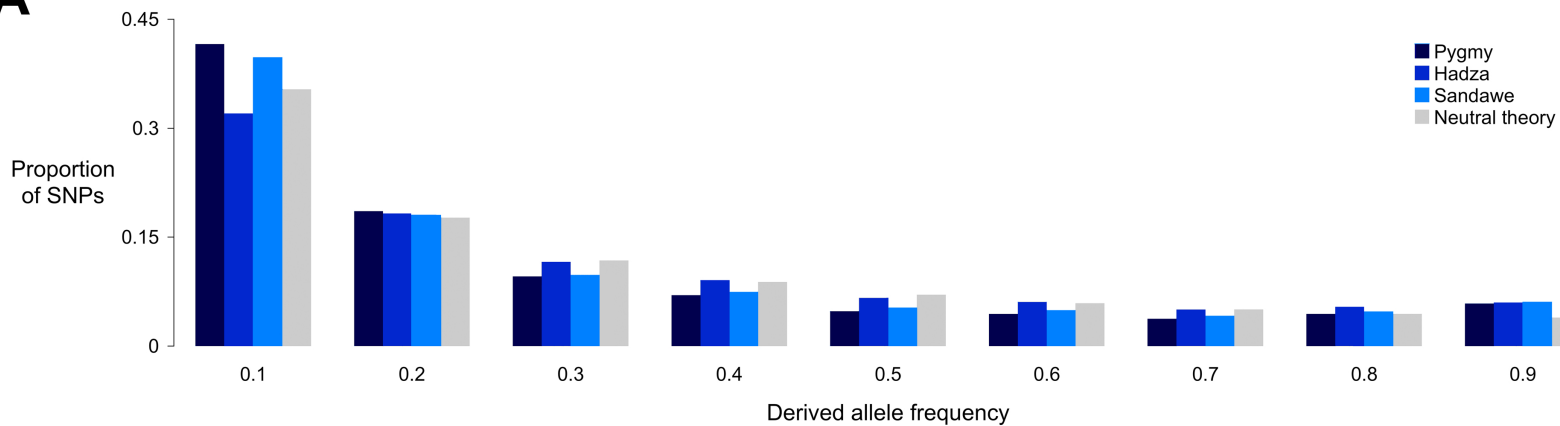

**B**

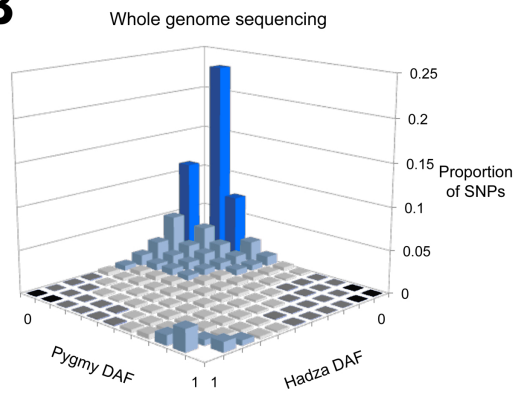

**C**

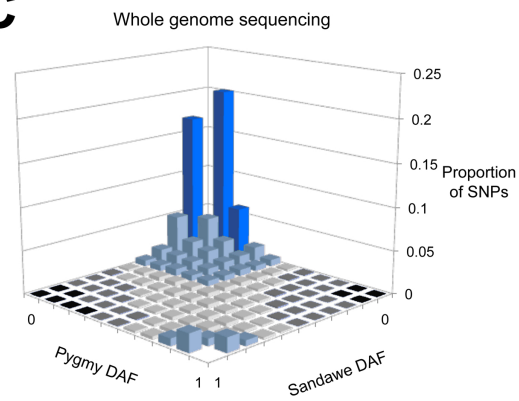

**D**

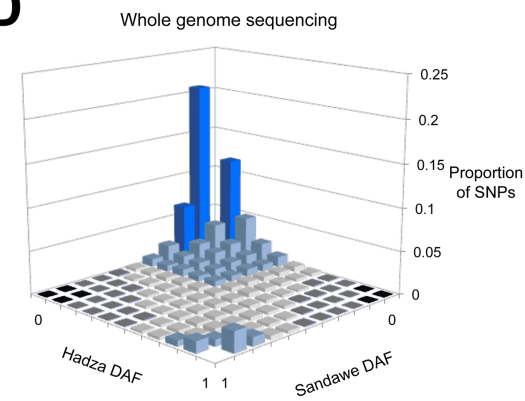

**E**

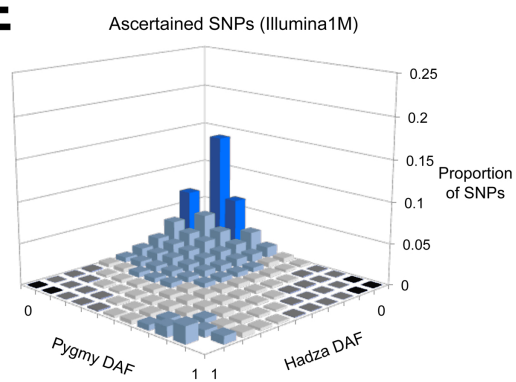

**F**

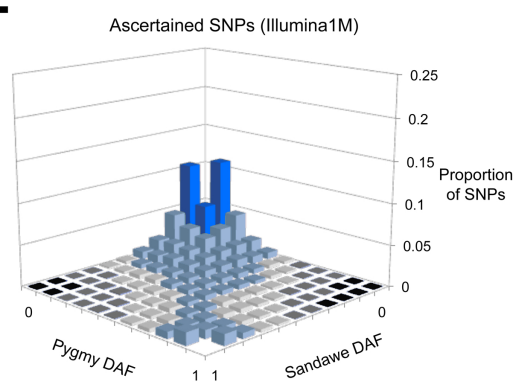

**G**

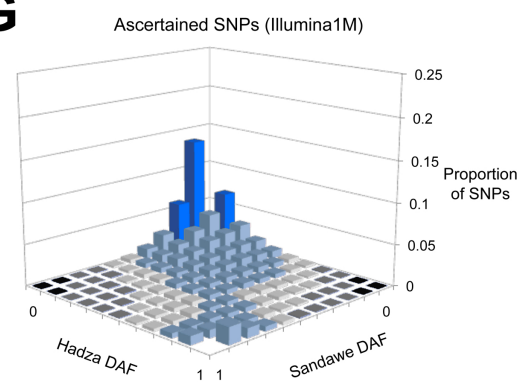

# Supplemental Figure 7

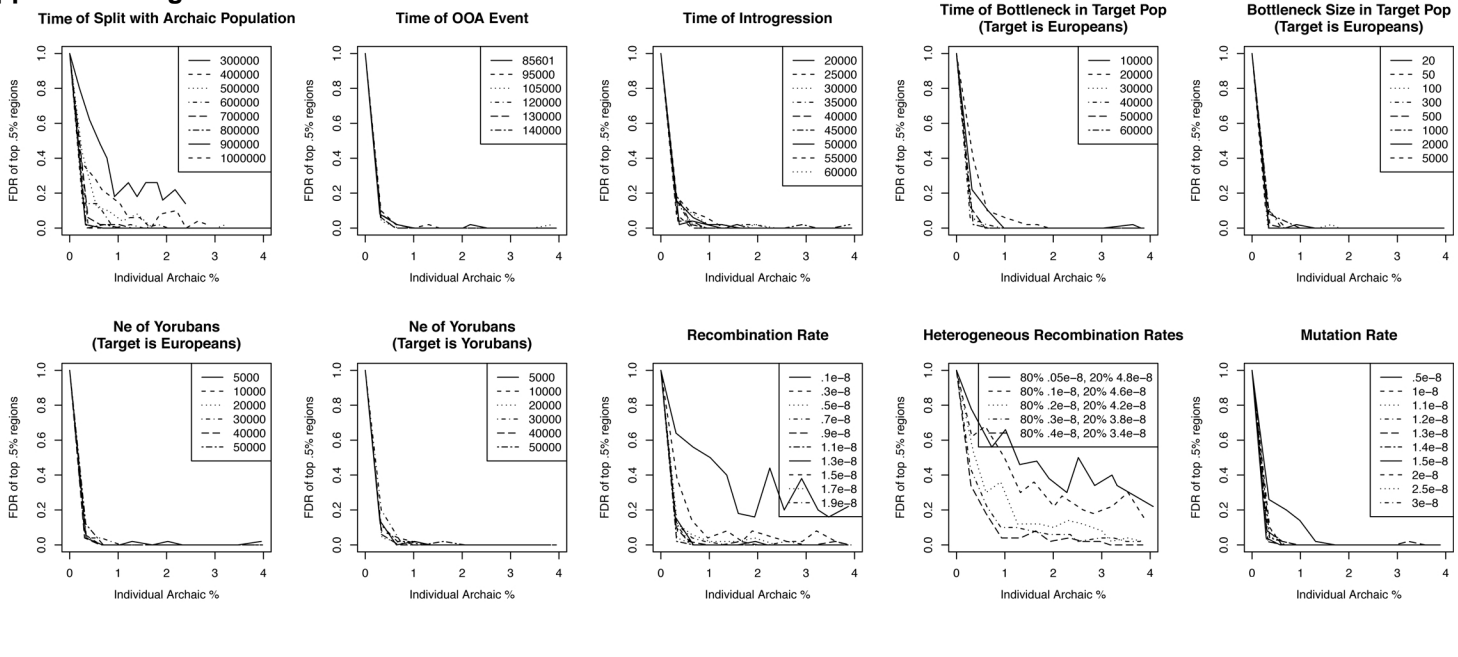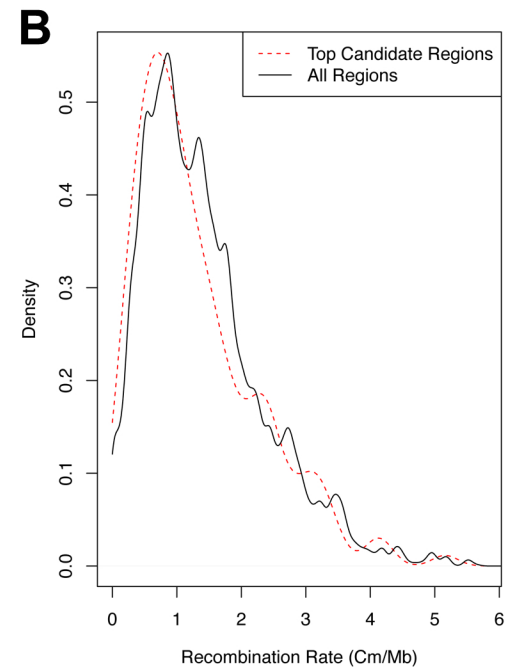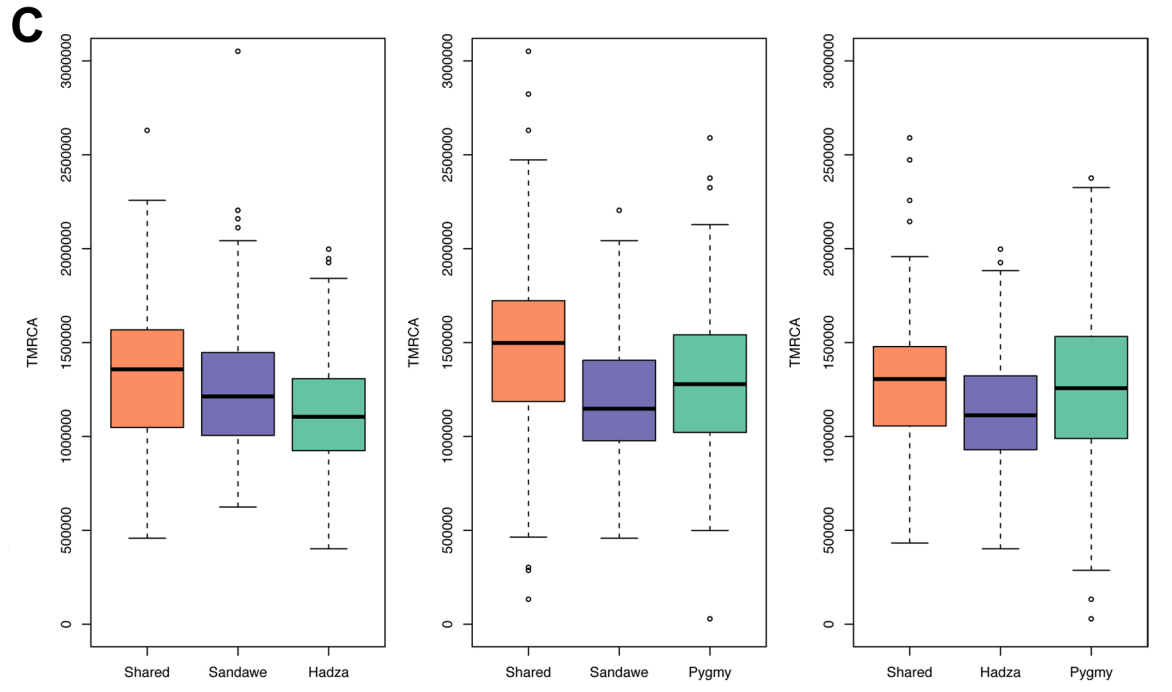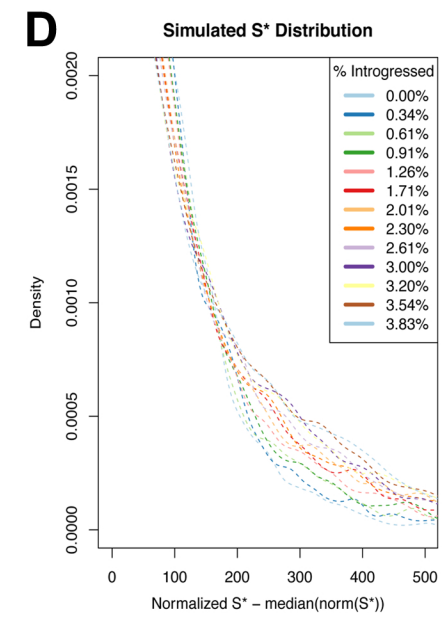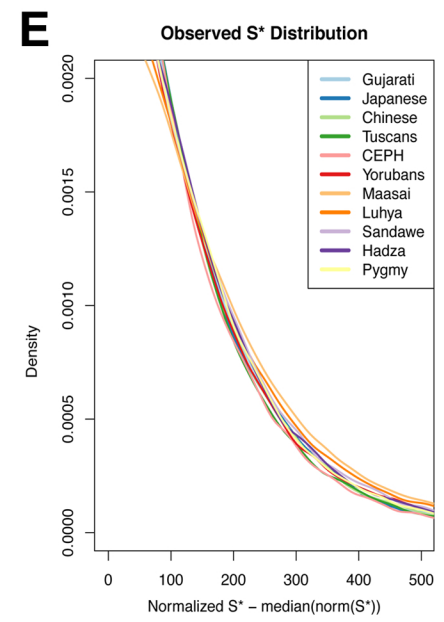

Supplement: NIHMS398077-supplement-02.pdf [file NIHMS398077-supplement-02.pdf]
